# Supplementary material for: Laparoscopic cholecystectomy for acute calculous cholecystitis: a retrospective study assessing risk factors for conversion and complications
Source: World J Emerg Surg. 2016 Nov 16;11:54. doi: 10.1186/s13017-016-0111-4 (PMC5112701; doi:10.1186/s13017-016-0111-4)
Supplement: Additional file 4: Figure S4. — Receiver operating characteristic (ROC) curve for duration of surgery in patients with complications. Surgery duration of 90 min yields a sensitivity of 0.72 and specificity of 0.40. Area under the curve (AUC) 0.59. (PDF 88 kb) [file 13017_2016_111_MOESM4_ESM.pdf]

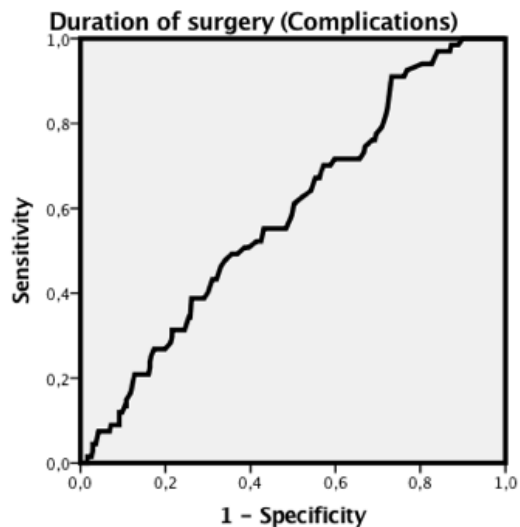

**Figure 4**

Receiver operating characteristic (ROC) curve for duration of surgery in patients with complications. Surgery duration of 90 minutes yields a sensitivity of 0.72 and specificity of 0.40. Area under the curve (AUC) 0.59.
