# Supplementary material for: Laparoscopic cholecystectomy for acute calculous cholecystitis: a retrospective study assessing risk factors for conversion and complications
Source: Springer Nature journal article supplement (doi:10.1186/s13017-016-0111-4), 2016-11-16
Supplement: MOESM2 [file 11053936]

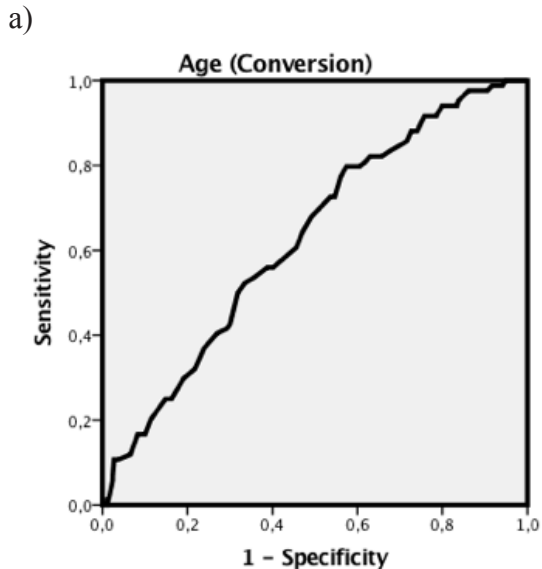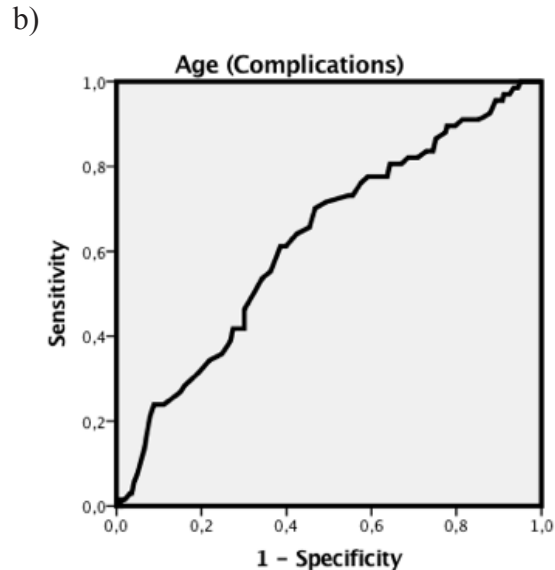

**Figure 2**

a) Receiver operating characteristic (ROC) curve for age in converted patients. Age of 65 years yields sensitivity of 0.58 and specificity of 0.57. Area under the curve (AUC) 0.63.

b) ROC curve for age in patients with complications. Age of 65 years yields sensitivity of 0.63 and specificity of 0.59. AUC 0.63.
