# Supplementary material for: Laparoscopic cholecystectomy for acute calculous cholecystitis: a retrospective study assessing risk factors for conversion and complications
Source: Springer Nature journal article supplement (doi:10.1186/s13017-016-0111-4), 2016-11-16
Supplement: MOESM3 [file 11053936]

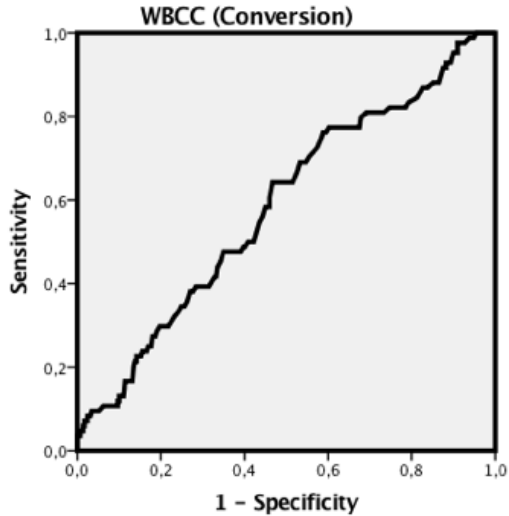

**Figure 3**

Receiver operating characteristic (ROC) curve for white blood cell count (WBC) in converted patients. WBC of  $13 \times 10^9/l$  yields a sensitivity of 0.62 and specificity of 0.54. Area under the curve (AUC) 0.59.
